# Supplementary material for: The Impact of Individual Anthropogenic Emissions Sectors on the Global Burden of Human Mortality due to Ambient Air Pollution
Source: PubMed Central journal article supplement (PMC5089880; doi:10.1289/ehp177), 2016-05-13
Supplement: EHP177.s001.acco.pdf [file EHP177.s001.acco.pdf]

*Editor's Note: The tables have been reordered since Supplemental Material was originally published. The current order reflects the citations in the final published article.*

**Note to readers with disabilities:** *EHP* strives to ensure that all journal content is accessible to all readers. However, some figures and Supplemental Material published in *EHP* articles may not conform to [508 standards](#) due to the complexity of the information being presented. If you need assistance accessing journal content, please contact [ehp508@niehs.nih.gov](mailto:ehp508@niehs.nih.gov). Our staff will work with you to assess and meet your accessibility needs within 3 working days.

## **Supplemental Material**

# **The Impact of Individual Anthropogenic Emissions Sectors on the Global Burden of Human Mortality due to Ambient Air Pollution**

Raquel A. Silva, Zachariah Adelman, Meridith M. Fry, and J. Jason West

### **Table of Contents**

1. Input emissions
2. MOZART-4 performance evaluation
3. Simulation with zeroed-out anthropogenic emissions
4. Ozone and PM<sub>2.5</sub> surface concentrations
5. Population and Baseline Mortality Rates
6. Additional mortality results
7. Sensitivity Analysis (additional information)

References

**Table S1** – Emissions source sectors included in the RCP8.5 global emissions inventory.

**Table S2** – Global emissions per sector for six pollutants (Tg/yr) in the RCP 8.5 Global Emissions Inventory, 2005, and the total emissions for all 12 sectors and for the sectors modeled in zero-out simulations (and percentage of the modeled sectors in total emissions in parenthesis).

**Table S3** – Ozone concentrations for baseline and zero-out simulations (ppb), showing the population- weighted average for each region of the average 1-hr daily maximum ozone for the consecutive 6-month period with the highest average.

**Table S4** – PM<sub>2.5</sub> concentrations for baseline and zero-out simulations (µg/m<sup>3</sup>), showing the population- weighted average for each region of the annual average concentrations.

**Table S5** – Concentrations of seven PM<sub>2.5</sub> species in the baseline simulation (µg/m<sup>3</sup>), showing the population- weighted average for each region of the annual average concentrations.

**Table S6** – Regional and global total population, exposed population (adults age 25 and older), and average cause-specific mortality rates (for the exposed population).

**Table S7** – Premature ozone-related respiratory mortality in ten world regions, and contributions from different sectors (deaths in 2005), showing the mean and 95% CI from 1000 Monte Carlo simulations. All numbers are rounded to three significant digits. Regional mean values correspond to the values shown in Figure 3 of the main paper.

**Table S8** – Premature ozone-related respiratory mortality in ten world regions, and contributions from different sectors (deaths in 2005), showing the deterministic mean estimates. All numbers are rounded to three significant digits.

**Table S9** – Premature ozone-related respiratory mortality per million people in total population in ten world regions, and contributions from different sectors (deaths per million people in 2005), showing the mean from 1000 Monte Carlo simulations. All numbers are rounded to the nearest unit.

**Table S10** – Premature PM<sub>2.5</sub>-related mortality in ten world regions (IHD+Stroke+COPD+LC), and contributions from different sectors (deaths in 2005), showing the mean and 95% CI from 1000 Monte Carlo simulations. All numbers are rounded to three significant digits. Regional mean values correspond to the values shown in Figure 5 of the main paper.

**Table S11** – Premature PM<sub>2.5</sub>-related mortality (IHD+Stroke+COPD+LC) in ten world regions, and contributions from different sectors (deaths in 2005), showing the deterministic mean estimates. All numbers are rounded to three significant digits.

**Table S12** – Premature PM<sub>2.5</sub> -related mortality (IHD+Stroke+COPD+LC) per million people in total population in ten world regions, and contributions from different sectors (deaths per million people in 2005), showing the mean from 1000 Monte Carlo simulations. All numbers are rounded to the nearest unit.

**Table S13** – Premature ozone and PM<sub>2.5</sub>-related mortality in ten world regions for the contribution of all anthropogenic emissions at 2.5°x1.9° horizontal resolution (deaths in 2005), showing the deterministic mean estimates. All numbers are rounded to three significant digits.

**Table S14** – Premature ozone and PM<sub>2.5</sub>-related mortality in ten world regions for the contribution of all anthropogenic emissions for the simulations at 0.67°x0.5° regrided to 2.5°x1.9° horizontal resolution (deaths in 2005), showing the deterministic mean estimates. All numbers are rounded to three significant digits.

**Figure S1** – Comparison of simulated monthly mean surface ozone concentrations (2005) with CASTNet monitored concentrations (2005) for eight US regions, showing modeled regional mean (red), CASTNET regional mean (black) and individual monitoring locations (grey). An overall model bias of 7.2 ppbv is calculated across all stations.

**Figure S2** – Comparison of simulated monthly mean surface ozone concentrations (2005) with EMEP monitored concentrations (2005) for six European regions, showing modeled regional mean (red), EMEP regional mean (black) and individual monitoring locations (grey). An overall model bias of 2.3 ppbv is calculated across all stations.

**Figure S3** – Comparison of the simulated annual average (2005) surface SO<sub>4</sub> concentrations (μg m<sup>-3</sup>) with annual average (2005) observations from the IMPROVE(A) and the EMEP (B) surface monitoring networks for the US and Europe, respectively. The left panels show modeled versus observed concentrations (μg m<sup>-3</sup>) with the dashed 1:2 and 2:1 lines representing agreement within a factor of 2. The right panels show a map of [(modeled-observed)/observed] values.

**Figure S4** – Comparison of the simulated annual average (2005) surface NH<sub>4</sub>NO<sub>3</sub> concentrations (μg m<sup>-3</sup>) with annual average (2005) observations from the IMPROVE (A) and the EMEP (B) surface monitoring networks for the US and Europe, respectively. The left panels show modeled versus observed concentrations (μg m<sup>-3</sup>) with the dashed 1:2 and 2:1 lines representing

agreement within a factor of 2. The right panels show a map of [(modeled-observed)/observed] values.

**Figure S5** – Comparison of the simulated annual average (2005) surface EC concentrations ( $\mu\text{g m}^{-3}$ ) with annual average (2005) observations from the IMPROVE surface monitoring networks, US. The left panels show modeled versus observed concentrations ( $\mu\text{g m}^{-3}$ ) with the dashed 1:2 and 2:1 lines representing agreement within a factor of 2. The right panels show a map of [(modeled-observed)/observed] values.

**Figure S6** – Comparison of the simulated annual average (2005) surface OC concentrations ( $\mu\text{g m}^{-3}$ ) with annual average (2005) observations from the IMPROVE surface monitoring networks, US. The left panels show modeled versus observed concentrations ( $\mu\text{g m}^{-3}$ ) with the dashed 1:2 and 2:1 lines representing agreement within a factor of 2. The right panels show a map of [(modeled-observed)/observed] values.

**Figure S7** – Ten World Regions.

**Figure S8** – Ozone concentrations in the baseline simulation (ppb), showing the average 1-hr daily maximum ozone for the consecutive 6-month period with the highest average in each cell.

**Figure S9** – Difference in ozone concentrations between the baseline and zeroed-out simulations (ppb), using the average 1-hr daily maximum ozone for the consecutive 6-month period with the highest average in each cell.

**Figure S10** –  $\text{PM}_{2.5}$  concentrations in the baseline simulation ( $\mu\text{g}/\text{m}^3$ ), showing the annual average concentrations in each cell.

**Figure S11** – Fraction of selected  $\text{PM}_{2.5}$  species (A – D) in total  $\text{PM}_{2.5}$  concentrations in the baseline simulation.

**Figure S12** – Difference in  $\text{PM}_{2.5}$  concentrations between the baseline and zeroed-out simulations (A – F) ( $\mu\text{g}/\text{m}^3$ ), using the annual average concentrations in each cell.

## 1. Input emissions

Input anthropogenic and biomass burning emissions were processed from datasets at  $0.5^\circ \times 0.5^\circ$  horizontal resolution prepared for the IPCC's Fifth Assessment Report and obtained through the GEIA-ACCENT Emission Data Portal<sup>1</sup>, for the IPCC AR5 Representative Concentration Pathway 8.5 (RCP8.5) global emissions inventory (Riahi et al. 2011) for 2005.

Anthropogenic emissions were processed as described by Fry et al. (2013), including speciation of volatile organic compound (VOC) species to MOZART-4 VOC categories, adding monthly temporal variation to all emissions species from anthropogenic sources, and regridding to  $0.67^\circ \times 0.5^\circ$  horizontal resolution. We applied 1.15 and 1.4 factors to black and organic carbon species, respectively, to adjust for the conversion of emissions from  $PM_{10}$  to  $PM_{2.5}$  in the Bond inventory (Bond et al. 2004; Cooke et al. 1999) used in the emissions dataset, following Liu et al. (2009), Anenberg et al. (2011) and West et al. (2013).

The baseline 2005 simulation was run with emissions from the 10 anthropogenic and 2 biomass burning emissions sectors included in the global emissions dataset (Tables S1 and S2).

## 2. MOZART-4 performance evaluation

MOZART-4 performance was evaluated by comparing surface concentrations of ozone and  $PM_{2.5}$  species (EC, OC,  $SO_4$ ,  $NH_4NO_3$ ) with 2005 surface air quality observations from the Clean Air Status and Trends Network (CASTNet) for the US (ozone), the European Monitoring and Evaluation Programme (EMEP) for Europe (ozone and  $PM_{2.5}$  species) and the Interagency

---

<sup>1</sup> [http://accent.aero.jussieu.fr/database\\_table\\_inventories.php](http://accent.aero.jussieu.fr/database_table_inventories.php)

Monitoring of Protected Visual Environments (IMPROVE) for remote locations in the U.S. (PM<sub>2.5</sub> species).

Figures S1 and S2 show comparisons of modeled surface ozone with observations from CASTNET and EMEP, respectively. For ozone, overall mean bias is 7.2 ppb for CASTNet and 2.3 ppb for EMEP. Throughout the year, the model shows higher biases in the US North West and Florida regions and, during the Summer, the highest biases are in the Great Lakes, North East and South East regions (regional average bias less than 25 ppb). In Europe, bias is lower than in the US.

Figures S3 to S6 show comparisons of modeled surface concentrations of PM<sub>2.5</sub> species with observations from IMPROVE and EMEP. For PM<sub>2.5</sub> species, the model shows good agreement with observations. Simulated annual average surface sulfate concentrations are mostly within a factor of two of observations, though with a tendency to underestimate. Simulated annual average ammonium nitrate concentrations are generally overestimated. EC and OC simulated annual average concentrations show very good agreement with observations in the US.

### **3. Simulation with zeroed-out anthropogenic emissions**

For this simulation we zeroed-out emissions from all anthropogenic sectors (i.e. Energy, Industry, Land Transportation, Shipping, Aviation, Residential & Commercial, Solvents, Agriculture, Agricultural Waste Burning, Waste). Also, we set total soil NO<sub>x</sub> emissions to a preindustrial value (3.6 Tg N yr<sup>-1</sup>, estimated by Yienger and Levy, 1995), following Horowitz (2006), and we fixed methane concentrations at 722 ppb (Myhre et al. 2013).

For biomass burning emissions, we took into account that climate was likely the main driver of global fire activity up to the early 18th century. In contrast, anthropogenic influence plays a major role afterwards; fire ignition is the greatest contributor to the increase in global fire activity up to the end of the 19th century and fire suppression is responsible for a considerable decrease in global fire activity in the 20th century (Marlon et al. 2008; Pechony and Shindell 2010; Power et al. 2012 and references therein). Considering that present-day savannah fires are mostly ignited by humans (Andrae, 1991; Schultz et al. 2008), that conditions in closed tropical forests are usually not conducive to biomass burning (Krawchuk et al. 2009) and that human-ignited fires related to tropical deforestation have greatly increased in recent decades (Mieville et al. 2010), we assumed natural emissions from savannah and tropical forest fires to be 10% of present-day emissions. We took into account that fire emissions likely increased substantially between 1750 and the late 1800s due to anthropogenic fire ignitions (Pechony and Shindell 2010; Power et al. 2012 and references therein), so a 50% assumption (Moulliot et al. 2006) would not be applicable. For forest fires at extratropical latitudes (greater than 30° N and 20° S), we assumed natural emissions to be 90% of present-day emissions to account for the reduced effect of anthropogenic ignition in these regions (Andrae, 1991; Eliseev et al. 2014), although others suggest that a lower percentage may be appropriate in the boreal Eurasian forests (Mollicone et al. 2006).

#### **4. Ozone and PM<sub>2.5</sub> surface concentrations**

All averaged concentrations mentioned in this section are population-weighted averages, unless otherwise stated. All regional results refer to the regions shown in Figure S7.

#### **4.1 Ozone**

Modeled hourly ozone concentrations were processed to estimate the average 1-hr daily maximum concentration for the consecutive 6-month period with the highest average, in each grid cell.

Ozone concentrations in the baseline simulation were 56.0 ppb globally, ranging from 39.9 to 64.1 ppb across ten world regions, with the highest values in East Asia, India and US (Table S3 and Figure S8). When all anthropogenic emissions were zeroed-out, global concentrations decreased to 22.2 ppb (40% of baseline) and regional concentrations ranged from 17.0 to 24.3 ppb, reflecting a much lower spatial variability in surface ozone (Table S3). Considering the results of the simulations with the different sectors zeroed-out (Table S3 and Figure S9), All Transportation had the highest contribution to surface ozone, globally (14%) and across all regions, with Land Transportation accounting for close to 70% of the global contribution from All Transportation. Land Transportation had the greatest individual contribution in most regions, except Africa (Residential & Commercial) and Southeast Asia and Australia (Energy). In East Asia, the contribution of Industry was very close to Land Transportation.

#### **4.2 PM<sub>2.5</sub>**

Annual average PM<sub>2.5</sub> concentrations were estimated as a sum of individual model output species:

$$\text{PM}_{2.5} = \text{CB1} + \text{CB2} + (\text{OC1} * 1.3 + \text{OC2} * 1.7) + \text{SO4} + \text{NO3} + \text{SOA} + \\ + 0.2 * (\text{DUST1} + \text{DUST2} + \text{DUST3}) + (\text{SA1} + \text{SA2} + \text{SA3})$$



CB1 and CB2 are black carbon species. OC1 and OC2 are primary organic carbon species. The 1.3 and 1.7 factors applied to OC1 and OC2 account for species other than carbon in organic aerosol. SO4 is sulfate (estimated as ammonium sulfate). NO3 is nitrate (estimated as ammonium nitrate). SOA is secondary organic aerosol. DUST1, DUST2 and DUST3 and SA1, SA2 and SA3 are the size fractions of dust and sea salt relevant for PM<sub>2.5</sub> (size bins 1-3). Since modeled windblown dust is highly uncertain and caused PM<sub>2.5</sub> model estimates to be unrealistically large in arid regions, dust was adjusted with a 0.2 factor so that global PM<sub>2.5</sub> surface concentrations roughly agree with those estimated by Brauer et al. (2012), as had been done by West et al. (2013).

PM<sub>2.5</sub> concentrations in the baseline simulation were 22.0 µg/m<sup>3</sup> globally, ranging from 5.0 to 34.2 µg/m<sup>3</sup> regionally, with the highest values in East Asia, India and Middle East (Table S4 and Figure S10). Considering different species, global black carbon averages 1.4 µg/m<sup>3</sup>, primary organic aerosol (POA) averages 6.5 µg/m<sup>3</sup> and dust averages 5.8 µg/m<sup>3</sup>, while SOA averages 0.1 µg/m<sup>3</sup> and secondary inorganic aerosol (SIA = NO<sub>3</sub>+SO<sub>4</sub>) averages 4.2 µg/m<sup>3</sup> (Table S5 and Figure S11). Globally, POA corresponds to the greatest fraction of total PM<sub>2.5</sub> concentration (29%), followed closely by dust (26%); however, in some regions other species account for the greatest fractions, such as sulfate in North America (31%), nitrate in Europe (43%) and East Asia (33%), and dust in Africa (65%) and Middle East (72%).

When all anthropogenic emissions were zeroed-out, global concentrations decreased to 6.6 µg/m<sup>3</sup> (30% of baseline) and regional concentrations ranged from 1.4 to 20.6 µg/m<sup>3</sup> with the highest value in the Middle East (Table S4). Also, the reduction was the greatest in East Asia

(less 91%) and the least in the Middle East (less 26%) and Africa (less 30%), due to the fraction of dust in these latter regions.

Considering the results of the simulations with the different sectors zeroed-out (Table S4 and Figure S12), Residential & Commercial had the highest contribution to surface PM<sub>2.5</sub>, globally (28%) and in several regions. Land Transportation had the greatest individual contribution in North America and Europe.

## **5. Population and Baseline Mortality Rates**

Table S6 shows the global and regional total population, exposed population (adults aged 25 and older), and cause-specific baseline mortality rates obtained from the gridded values used in the health impact assessment.

## **6. Additional mortality results**

Tables S7 and S10 show present-day global and regional burdens of anthropogenic ozone and PM<sub>2.5</sub>-related mortality.

We also obtained deterministic estimates for mortality, considering the mean values reported for each of the variables (see Tables S8 and S11). For anthropogenic ozone mortality, the global mean from the Monte Carlo simulations is 0.1% greater than the deterministic estimate (492,000 deaths/year), with less than  $\pm 1\%$  differences for most regions, except Middle East (2%) and Africa (5%). For anthropogenic PM<sub>2.5</sub> mortality, there is a larger difference (-5%) between the global mean from the Monte Carlo simulation and the deterministic estimate (2.36

million deaths/year), reflecting large differences at the regional level in some regions (e.g. -15% in India, -4% in East Asia, -6% in Europe, 19% in North America).

Tables S9 and S12 show ozone- and PM<sub>2.5</sub>-related total mortality rates per sector, considering total population, per region and globally. India and East Asia have 113 deaths per million people per year due to exposure to anthropogenic ozone, compared to 69 deaths per million people in North America and lower rates in all other regions (Table S9). The greatest sectoral global impact is due to Land Transportation, which contributes 12 deaths per million people per year.

FSU has the highest anthropogenic PM<sub>2.5</sub>-related mortality rate (714 deaths/year per million people), closely followed by East Asia (683 deaths/year per million people), while Europe and India have 457 and 268 deaths/year per million people, respectively (Table S12). The greatest global sectoral impact is due to Residential & Commercial, which contributes 97 deaths per million people per year.

## **7 Sensitivity Analysis (additional information)**

### ***7.1 Fine vs. coarse resolution***

Using the output from simulations at 2.5°x1.9° horizontal resolution, we estimate a present-day global burden of anthropogenic ozone-related mortality of 480,000 deaths/year, a slight negative bias of 2% relative to the deterministic estimate at finer resolution (Table S13); this negative bias was greater in some regions (e.g. South America, -9%; Southeast Asia, -8%; Africa, -6%; Australia, -12%). For anthropogenic PM<sub>2.5</sub> mortality, we estimate 2.7 million deaths/year, which corresponds to a global positive bias of 16% for the coarse resolution

estimate, resulting from considerably different regional bias, including much larger positive biases in North America (52%), Europe (34%) and FSU (39%), smaller positive biases in India (4%), East Asia (11%) and Southeast Asia (11%), and a 15% negative bias in South America (Table S13).

If we regrid the output from simulations at  $0.67^{\circ} \times 0.5^{\circ}$  horizontal resolution to  $2.5^{\circ} \times 1.9^{\circ}$  horizontal resolution, we estimate a present-day global burden of anthropogenic ozone-related mortality of 479,000 deaths/year, a slight negative bias of 3% relative to the deterministic estimate at finer resolution, while for anthropogenic  $PM_{2.5}$  mortality we estimate a burden of 2.2 million deaths /year, corresponding to a negative bias of 8% (Table S14).

### ***7.2 Low-concentration threshold for ozone***

By applying a low-concentration threshold of 33.3ppb to the ozone mortality calculation, we estimate a 27.4% decrease in the global mortality burden, since ozone concentrations for the simulation with all anthropogenic emissions zeroed-out are below the threshold, except in a few very small areas in Africa. The low-concentration threshold has a negligible effect on the contributions of each sector (less than 2%) since ozone concentrations with zeroed-out sectors are lower than the threshold only in a few populated areas, mostly in South America and Australia.

## References

- Andreae MO. 1991. Biomass burning: Its history, use and distribution and its impact on environmental quality and global climate. In *Global Biomass Burning: Atmospheric, Climatic and Biospheric Implications* (J.S. Levine ed. ), pp. 3–21, MIT Press, Cambridge, Mass.
- Anenberg SC, Talgo K, Arunachalam S, Dolwick P, Jang C, West JJ. 2011. Impacts of global, regional, and sectoral black carbon emission reductions on surface air quality and human mortality. *Atmos Chem Phys* 11:7253–7267; doi:10.5194/acp-11-7253-2011.
- Bond TC, Streets DG, Yarber KF, Nelson SM, Woo JH, Klimont Z. 2004. A technology-based global inventory of black and organic carbon emissions from combustion. *J Geophys Res D Atmos* 109:1–43; doi:10.1029/2003JD003697.
- Brauer M, Amann M, Burnett RT, Cohen A, Dentener F, Ezzati M, et al. 2012. Exposure assessment for estimation of the global burden of disease attributable to outdoor air pollution. *Environ Sci Technol* 46:652–60; doi:10.1021/es2025752.
- Bright EA, Coleman PR, Rose AN, Urban ML. 2012. LandScan 2011. Oak Ridge National Laboratory SE, Oak Ridge, TN.
- Burnett RT, Arden Pope C, Ezzati M, Olives C, Lim SS, Mehta S, et al. 2014. An integrated risk function for estimating the global burden of disease attributable to ambient fine particulate matter exposure. *Environ Health Perspect* 122:397–403; doi:10.1289/ehp.1307049.
- Cooke WF, Liousse C, Cachier H, Feichter J. 1999. Construction of a 1° x 1° fossil fuel emission data set for carbonaceous aerosol and implementation and radiative impact in the ECHAM4 model. *J Geophys Res* 104: 22137–22162.
- Eliseev A V, Mokhov II, Chernokulsky A V. 2014. An ensemble approach to simulate CO<sub>2</sub> emissions from natural fires. *Biogeosciences* 11:3205–3223; doi:10.5194/bg-11-3205-2014.
- Fry MM, Schwarzkopf MD, Adelman Z, Naik V, Collins WJ, West JJ. 2013. Net radiative forcing and air quality responses to regional CO emission reductions. *Atmos Chem Phys* 13:5381–5399; doi:10.5194/acp-13-5381-2013.
- Horowitz LW. 2006. Past, present, and future concentrations of tropospheric ozone and aerosols: Methodology, ozone evaluation, and sensitivity to aerosol wet removal. *J Geophys Res* 111:D22211; doi:10.1029/2005JD006937.
- Institute for Health Metrics and Evaluation (IHME). 2013. Global Burden of Disease Study 2010 (GBD 2010) Results by Cause 1990–2010 - Country Level. Seattle, United States.

- Krawchuk MA, Moritz MA, Parisien M-A, Van Dorn J, Hayhoe K. 2009. Global Pyrogeography : the Current and Future Distribution of Wildfire. *PLoS One* 4:e5102; doi:10.1371/journal.pone.0005102.
- Krewski D, Jerrett M, Burnett RT, Ma R, Hughes E, Shi Y, et al. 2009. Extended Follow-Up and Spatial Analysis of the American Cancer Society Study Linking Particulate Air Pollution and Mortality. *Respir Rep Heal Eff Inst* 140: 5–114.
- Lamarque JF, Bond TC, Eyring V, Granier C, Heil A, Klimont Z, et al. 2010. Historical (1850–2000) gridded anthropogenic and biomass burning emissions of reactive gases and aerosols: Methodology and application. *Atmos Chem Phys* 10:7017–7039; doi:10.5194/acp-10-7017-2010.
- Lamarque JF, Shindell DT, Josse B, Young PJ, Cionni I, Eyring V, et al. 2013. The atmospheric chemistry and climate model intercomparison Project (ACCMIP): Overview and description of models, simulations and climate diagnostics. *Geosci Model Dev* 6:179–206; doi:10.5194/gmd-6-179-2013.
- Liu J, Mauzerall DL, Horowitz LW, Ginoux P, Fiore AM. 2009. Evaluating inter-continental transport of fine aerosols: (1) Methodology, global aerosol distribution and optical depth. *Atmos Environ* 43:4327–4338; doi:10.1016/j.atmosenv.2009.03.054.
- Marlon JR, Bartlein PJ, Carcaillet C, Gavin DG, Harrison SP, Higuera PE, et al. 2008. Climate and human influences on global biomass burning over the past two millennia. *Nat Geosci* 1:697–702; doi:10.1038/ngeo468
- Mieville A, Granier C, Lioussé C, Guillaume B, Mouillot F, Lamarque JF, et al. 2010. Emissions of gases and particles from biomass burning during the 20th century using satellite data and an historical reconstruction. *Atmos Environ* 44:1469–1477; doi:10.1016/j.atmosenv.2010.01.011.
- Mollicone D, Eva HD, Achard F. 2006. Human role in Russian wild fires. *Nature* 440:436–437; doi:10.1038/440435a.
- Mouillot F, Narasimha A, Balkanski Y, Lamarque J-F, Field CB. 2006. Global carbon emissions from biomass burning in the 20th century. *Geophys Res Lett* 33:2–5; doi:10.1029/2005GL024707.
- Myhre G, Shindell D, Bréon F-M, Collins W, Fuglestedt J, Huang J, et al. 2013. Anthropogenic and Natural Radiative Forcing. In *Climate Change 2013: The Physical Science Basis. Contribution of Working Group I to the Fifth Assessment Report of the Intergovernmental Panel on Climate Change* (Stocker TF, Qin D, Plattner G-K, Tignor M, Allen SK, Boschung J, et al. eds.), pp. 659–740, Cambridge University Press, Cambridge, United Kingdom and New York, NY, USA.

- Pechony O, Shindell DT. 2010. Driving forces of global wildfires over the past millennium and the forthcoming century. *Proc Natl Acad Sci USA* 107:19167–19170; doi:10.1073/pnas.1003669107.
- Power MJ, Mayle FE, Bartlein PJ, Marlon JR, Anderson RS, Behling H, et al. 2012. Climatic control of the biomass-burning decline in the Americas after AD 1500. *The Holocene* 23:3; doi:10.1177/0959683612450196.
- Riahi K, Rao S, Krey V, Cho CH, Chirkov V, Fischer G, et al. 2011 RCP 8.5-A scenario of comparatively high greenhouse gas emissions. *Clim Ch* 109: 33-57; doi:10.1007/s10584-011-0149-y.
- Schultz MG, Heil A, Hoelzemann JJ, Spessa A, Thonicke K, Goldammer JG, et al. 2008. Global wildland fire emissions from 1960 to 2000. *Global Biogeochem Cycles* 22:1–17; doi:10.1029/2007GB003031.
- Silva RA, West JJ, Zhang Y, Anenberg SC, Lamarque J-F, Shindell DT, et al. 2013. Global premature mortality due to anthropogenic outdoor air pollution and the contribution of past climate change. *Environ Res Lett* 8:034005; doi:10.1088/1748-9326/8/3/034005.
- West JJ, Smith SJ, Silva RA, Naik V, Zhang Y, Adelman Z, et al. 2013. Co-benefits of Global Greenhouse Gas Mitigation for Future Air Quality and Human Health. *Nat Clim Chang* 3:885–889; doi:10.1038/NCLIMATE2009.
- Yienger JJ and Levy, H. 1995. Empirical model of global soil-biogenic NO<sub>x</sub> emissions. *J Geophys Res* 100: 11447–11464.

Table S1 – Emissions source sectors included in the RCP8.5 global emissions inventory.

| Sector code                      | Short name                 | Definition (based on IPCC/CRF source/sink sectors)                                                                                                                                                               |
|----------------------------------|----------------------------|------------------------------------------------------------------------------------------------------------------------------------------------------------------------------------------------------------------|
| <b>Anthropogenic Emissions</b>   |                            |                                                                                                                                                                                                                  |
| Ene                              | Energy                     | Energy production and distribution: Public electricity and heat production, petroleum refining, manufacture of solid fuels and other energy industries. Fugitive emissions from solid fuels, oil and gas.        |
| Ind                              | Industry                   | Industrial processes and combustion: Manufacturing industries and construction, inc. production of metals, chemicals, pulp /paper / print, food processing/beverages/tobacco, and other industries.              |
| tra*                             | Land Transportation        | Land transport: Road transportation (cars, light duty trucks, heavy duty trucks and buses, motorcycles, evaporative emissions from vehicles), railways, and other transportation (pipeline transport, off-road). |
| shp*                             | Shipping                   | Maritime transport: International shipping                                                                                                                                                                       |
| aircraft*                        | Aviation                   | Civil Aviation                                                                                                                                                                                                   |
| Dom                              | Residential & Commercial   | Residential and commercial combustion**                                                                                                                                                                          |
| Slv                              | Solvents                   | Solvent production and use                                                                                                                                                                                       |
| Agr                              | Agriculture                | Agriculture (animals, rice, soil): Enteric fermentation, manure management, rice cultivation, soil emissions, other                                                                                              |
| Awb                              | Agricultural Waste Burning | Agriculture (waste burning on fields): Field burning of agricultural residues                                                                                                                                    |
| Wst                              | Waste                      | Waste Treatment and Disposal: Solid waste disposal on land, wastewater handling, waste incineration                                                                                                              |
| <b>Biomass Burning Emissions</b> |                            |                                                                                                                                                                                                                  |
| Lcf                              | Forest burning             | Forest fires                                                                                                                                                                                                     |
| Sav                              | Grassland burning          | Savanna burning, grassland fires                                                                                                                                                                                 |

\* All Transportation includes these three sectors.

\*\* According to Lamarque et al. (2010), includes emissions from fuelwood burning and charcoal production.



Table S2 – Global emissions per sector for six pollutants (Tg/yr) in the RCP 8.5 Global Emissions Inventory, 2005, and the total emissions for all 12 sectors and for the sectors modeled in zero-out simulations (and percentage of the modeled sectors in total emissions in parenthesis).

|                                | CO          | NO          | NMVOG        | SO <sub>2</sub> | BC         | OC          |
|--------------------------------|-------------|-------------|--------------|-----------------|------------|-------------|
| Ene                            | 21.1        | 17.1        | 29.1         | 57.7            | 0.05       | 0.3         |
| Dom                            | 261.3       | 6.2         | 38.6         | 8.8             | 2.1        | 8.2         |
| Ind                            | 114.3       | 11.2        | 9.0          | 26.9            | 1.6        | 2.3         |
| Tra                            | 161.8       | 20.5        | 28.5         | 3.4             | 1.2        | 1.3         |
| Wst                            | 4.1         | 0.2         | 1.5          | 0.05            | 0.04       | 0.05        |
| Agr                            | 0.01        | 1.5         | 0.8          | -               | -          | -           |
| Slv                            | 1.0         |             | 22.7         | -               | -          | -           |
| Awb                            | 19.9        | 0.4         | 2.7          | 0.2             | 0.1        | 0.7         |
| Shp                            | 1.3         | 12.3        | 3.1          | 13.0            | 0.1        | 0.1         |
| Aircraft                       | -           | 0.8         | -            | -               | 0.003      | -           |
| Lcf                            | 229.3       | 3.9         | 41.7         | 2.2             | 1.1        | 12.0        |
| Sav                            | 222.3       | 7.5         | 35.1         | 1.6             | 1.5        | 10.9        |
| <b>Total</b>                   | <b>1036</b> | <b>81.7</b> | <b>212.9</b> | <b>113.9</b>    | <b>7.9</b> | <b>35.9</b> |
| modeled sectors (% of total)   | 559.8       | 68.1        | 108.4        | 109.9           | 5.2        | 12.2        |
| (ene+dom+ind+tra+shp+aircraft) | (54%)       | (83%)       | (51%)        | (96%)           | (65%)      | (34%)       |

Table S3 – Ozone concentrations for baseline and zero-out simulations (ppb), showing the population- weighted average for each region of the average 1-hr daily maximum ozone for the consecutive 6-month period with the highest average.

|                  | Baseline    | Residential<br>& Comm. | Energy      | Industry    | Land<br>Transp. | All<br>Transp. | All<br>Anthr. |
|------------------|-------------|------------------------|-------------|-------------|-----------------|----------------|---------------|
| <b>NA</b>        | 59.8        | 58.1                   | 56.0        | 57.0        | 51.4            | 47.5           | 20.3          |
| <b>SA</b>        | 39.9        | 39.0                   | 38.4        | 37.4        | 34.6            | 33.0           | 18.6          |
| <b>Europe</b>    | 53.5        | 52.1                   | 51.4        | 51.6        | 47.0            | 42.1           | 20.9          |
| <b>FSU</b>       | 48.4        | 47.4                   | 45.2        | 46.7        | 43.2            | 40.8           | 21.8          |
| <b>Africa</b>    | 45.9        | 42.0                   | 44.7        | 45.3        | 44.0            | 42.4           | 23.4          |
| <b>India</b>     | 60.5        | 55.2                   | 54.8        | 58.6        | 54.8            | 53.0           | 24.3          |
| <b>East Asia</b> | 64.1        | 60.3                   | 59.6        | 58.8        | 58.7            | 56.7           | 23.8          |
| <b>SE Asia</b>   | 52.1        | 49.5                   | 46.0        | 49.7        | 46.6            | 43.8           | 17.0          |
| <b>Australia</b> | 40.0        | 39.1                   | 36.1        | 36.1        | 37.7            | 34.9           | 17.3          |
| <b>ME</b>        | 57.4        | 55.3                   | 53.3        | 55.1        | 49.5            | 45.8           | 22.7          |
| <b>Global</b>    | <b>56.0</b> | <b>52.8</b>            | <b>52.0</b> | <b>53.3</b> | <b>50.5</b>     | <b>48.0</b>    | <b>22.2</b>   |

Table S4 – PM<sub>2.5</sub> concentrations for baseline and zero-out simulations (µg/m<sup>3</sup>), showing the population- weighted average for each region of the annual average concentrations.

|               | <b>Baseline</b> | <b>Residential<br/>&amp; Comm.</b> | <b>Energy</b> | <b>Industry</b> | <b>Land<br/>Transp.</b> | <b>All<br/>Transp.</b> | <b>All Anthr.</b> |
|---------------|-----------------|------------------------------------|---------------|-----------------|-------------------------|------------------------|-------------------|
| NA            | 8.5             | 7.6                                | 7.1           | 7.5             | 6.4                     | 6.2                    | 1.4               |
| SA            | 6.7             | 5.9                                | 6.4           | 5.0             | 5.7                     | 5.6                    | 2.0               |
| Europe        | 13.9            | 11.1                               | 12.0          | 12.5            | 10.9                    | 9.9                    | 2.7               |
| FSU           | 12.1            | 8.4                                | 10.8          | 11.3            | 11.2                    | 11.1                   | 3.6               |
| Africa        | 16.8            | 14.9                               | 16.4          | 16.5            | 16.6                    | 16.5                   | 11.7              |
| India         | 28.5            | 16.3                               | 24.3          | 25.4            | 26.6                    | 26.5                   | 8.5               |
| East Asia     | 34.2            | 23.3                               | 28.3          | 25.3            | 32.0                    | 31.5                   | 3.1               |
| SE Asia       | 12.0            | 8.1                                | 10.6          | 10.4            | 11.1                    | 10.9                   | 1.9               |
| Australia     | 5.0             | 4.7                                | 4.6           | 4.6             | 4.7                     | 4.6                    | 3.1               |
| ME            | 27.8            | 25.7                               | 26.1          | 26.5            | 26.1                    | 25.8                   | 20.6              |
| <b>Global</b> | <b>22.0</b>     | <b>15.7</b>                        | <b>19.4</b>   | <b>18.7</b>     | <b>20.4</b>             | <b>20.1</b>            | <b>6.6</b>        |

Table S5 – Concentrations of seven PM<sub>2.5</sub> species in the baseline simulation (µg/m<sup>3</sup>), showing the population- weighted average for each region of the annual average concentrations.

|               | <b>BC</b>  | <b>POA</b> | <b>Sulfate</b> | <b>SOA</b> | <b>Nitrate</b> | <b>Dust</b> | <b>Sea Salt</b> |
|---------------|------------|------------|----------------|------------|----------------|-------------|-----------------|
| NA            | 0.6        | 2.2        | 2.6            | 0.1        | 2.1            | 0.5         | 0.4             |
| SA            | 0.6        | 2.9        | 1.5            | 0.1        | 0.2            | 0.8         | 0.6             |
| Europe        | 0.8        | 2.4        | 2.4            | 0.0        | 5.9            | 1.5         | 0.8             |
| FSU           | 0.5        | 4.1        | 1.6            | 0.0        | 2.7            | 2.9         | 0.2             |
| Africa        | 0.5        | 3.9        | 0.9            | 0.1        | 0.2            | 11.0        | 0.3             |
| India         | 1.8        | 10.9       | 3.6            | 0.1        | 3.8            | 8.0         | 0.3             |
| East Asia     | 3.0        | 10.0       | 7.1            | 0.1        | 11.3           | 2.4         | 0.3             |
| SE Asia       | 0.8        | 5.9        | 3.4            | 0.2        | 0.5            | 0.7         | 0.5             |
| Australia     | 0.3        | 1.0        | 0.9            | 0.1        | 0.2            | 0.9         | 1.6             |
| ME            | 0.6        | 2.5        | 2.7            | 0.0        | 1.5            | 19.9        | 0.5             |
| <b>Global</b> | <b>1.4</b> | <b>6.5</b> | <b>3.6</b>     | <b>0.1</b> | <b>4.3</b>     | <b>5.8</b>  | <b>0.4</b>      |

Table S6 – Regional and global total population, exposed population (adults age 25 and older), and average cause-specific mortality rates (for the exposed population).

|           | Total<br>Population<br>(millions) | Population<br>25+<br>(millions) | Mortality Rates per 100,000<br>(for population 25 and over) |        |       |      |       |
|-----------|-----------------------------------|---------------------------------|-------------------------------------------------------------|--------|-------|------|-------|
|           |                                   |                                 | IHD                                                         | Stroke | COPD  | LC   | Resp  |
| NA        | 538.7                             | 330.5                           | 234.0                                                       | 84.6   | 62.2  | 61.5 | 75.4  |
| SA        | 404.1                             | 225.7                           | 141.8                                                       | 103.9  | 40.9  | 23.0 | 58.5  |
| Europe    | 516.7                             | 375.0                           | 285.3                                                       | 178.4  | 54.7  | 72.1 | 73.5  |
| FSU       | 293.6                             | 196.0                           | 684.5                                                       | 362.7  | 42.9  | 49.1 | 52.3  |
| Africa    | 885.6                             | 315.1                           | 65.5                                                        | 98.3   | 18.7  | 6.3  | 37.1  |
| India     | 1,460.2                           | 692.3                           | 169.9                                                       | 95.1   | 137.8 | 14.2 | 178.2 |
| East Asia | 1,553.2                           | 1,036.5                         | 119.1                                                       | 207.2  | 104.7 | 62.8 | 117.5 |
| SE Asia   | 644.9                             | 351.4                           | 118.2                                                       | 187.8  | 42.2  | 30.6 | 71.3  |
| Australia | 28.0                              | 18.5                            | 215.9                                                       | 97.4   | 49.0  | 54.0 | 62.4  |
| ME        | 621.1                             | 297.7                           | 190.3                                                       | 120.3  | 29.4  | 21.2 | 51.2  |
| Global    | 6,946.3                           | 3,838.8                         | 186.1                                                       | 157.5  | 76.3  | 40.9 | 97.5  |

Sources:

Population - Oak Ridge National Laboratory's Landscan 2011 Global Population Dataset (Bright et al. 2012).

Baseline mortality rates - Cause-specific baseline mortality rates for 187 countries (IHME 2013)

Table S7 – Premature ozone-related respiratory mortality in ten world regions, and contributions from different sectors (deaths in 2005), showing the mean and 95% CI from 1000 Monte Carlo simulations. All numbers are rounded to three significant digits. Regional mean values correspond to the values shown in Figure 3 of the main paper.

| Region          | All Anthropogenic              | All Transportation            | Land Transportation          | Energy                       | Industry                   | Residential & Commercial     |
|-----------------|--------------------------------|-------------------------------|------------------------------|------------------------------|----------------------------|------------------------------|
| North America   | 37,100<br>(8,380 - 74,800)     | 12,100<br>(2,840 - 25,600)    | 8,390<br>(1,790 - 18,400)    | 3,880<br>(880 - 8,390)       | 3,020<br>(594 - 6,360)     | 1,440<br>(347 - 3,040)       |
| South America   | 10,300<br>(302 - 23,600)       | 3,450<br>(292 - 7,950)        | 2,650<br>(212 - 6,420)       | 787<br>(38 - 1,890)          | 1,270<br>(0 - 2,990)       | 416<br>(30 - 958)            |
| Europe          | 32,800<br>(9,000 - 64,700)     | 12,100<br>(3,2030 - 24,700)   | 6,620<br>(1,840 - 14,100)    | 2,170<br>(610 - 4,520)       | 2,030<br>(498 - 4,100)     | 1,450<br>(360 - 3,000)       |
| F. Soviet Union | 10,300<br>(3,230 - 19,700)     | 3,090<br>(9470 - 6,070)       | 2,040<br>(645 - 4,120)       | 1,230<br>(370 - 2,420)       | 684<br>(1204 - 1,350)      | 402<br>(120 - 790)           |
| Africa          | 10,200<br>(3,050 - 22,900)     | 1,700<br>(494 - 3,930)        | 907<br>(267 - 2,040)         | 578<br>(151 - 1,310)         | 303<br>(79 - 699)          | 1,490<br>(431 - 3,280)       |
| India           | 165,000<br>(40,200 - 343,000)  | 35,900<br>(8,200 - 78,500)    | 27,100<br>(5,560 - 59,900)   | 27,500<br>(6,380 - 60,500)   | 9,160<br>(1,840 - 20,000)  | 26,000<br>(5,770 - 57,300)   |
| East Asia       | 175,000<br>(34,100 - 358,000)  | 32,600<br>(6,000 - 70,900)    | 23,500<br>(4,320 - 53,100)   | 20,900<br>(4,0670 - 46,600)  | 25,200<br>(4,320 - 53,800) | 18,500<br>(3,600 - 39,600)   |
| Southeast Asia  | 32,400<br>(8,000 - 66,900)     | 7,550<br>(1,780 - 16,200)     | 5,080<br>(980 - 11,300)      | 5,720<br>(920 - 13,100)      | 2,340<br>(426 - 5,300)     | 2,700<br>(659 - 5,790)       |
| Australia       | 979<br>(136 - 2,130)           | 232<br>(35 - 520)             | 103<br>(15 - 241)            | 180<br>(25 - 417)            | 176<br>(24 - 388)          | 38<br>(5 - 86)               |
| Middle East     | 19,300<br>(6,270 - 39,300)     | 6,690<br>(2,110 - 13,800)     | 4,570<br>(1,420 - 9,460)     | 2,220<br>(634 - 4,750)       | 1,380<br>(415 - 2,940)     | 1,350<br>(390 - 2,920)       |
| Global          | 493,000<br>(122,000 - 989,000) | 115,000<br>(27,800 - 244,000) | 80,900<br>(17,400 - 180,000) | 65,200<br>(14,500 - 143,000) | 45,600<br>(8,700 - 96,800) | 53,700<br>(12,300 - 116,000) |

Table S8 – Premature ozone-related respiratory mortality in ten world regions, and contributions from different sectors (deaths in 2005), showing the deterministic mean estimates. All numbers are rounded to three significant digits.

|           | All Anthr. | All Transp. | Land Transp. | Energy | Industry | Resid. & Comm. |
|-----------|------------|-------------|--------------|--------|----------|----------------|
| NA        | 37,400     | 12,000      | 8,500        | 3,960  | 3,020    | 1,430          |
| SA        | 10,400     | 3,430       | 2,680        | 803    | 1,270    | 415            |
| Europe    | 32,800     | 12,000      | 6,670        | 2,200  | 2,020    | 1,440          |
| FSU       | 10,200     | 3,040       | 2,050        | 1,240  | 678      | 400            |
| Africa    | 9,670      | 1,600       | 875          | 566    | 289      | 1,430          |
| India     | 163,000    | 35,200      | 27,000       | 27,700 | 9,020    | 25,700         |
| East Asia | 176,000    | 32,300      | 23,800       | 21,400 | 25,300   | 18,500         |
| SE Asia   | 32,200     | 7,400       | 5,080        | 5,790  | 2,310    | 2,680          |
| Australia | 979        | 229         | 104          | 183    | 175      | 38             |
| ME        | 18,900     | 6,490       | 4,510        | 2,200  | 1,340    | 1,330          |
| Global    | 492,000    | 114,000     | 81,300       | 66,000 | 45,400   | 53,400         |

Table S9 – Premature ozone-related respiratory mortality per million people in total population in ten world regions, and contributions from different sectors (deaths per million people in 2005), showing the mean from 1000 Monte Carlo simulations. All numbers are rounded to the nearest unit.

|           | All Anthr. | All Transp. | Land Transp. | Energy | Industry | Resid. & Comm. |
|-----------|------------|-------------|--------------|--------|----------|----------------|
| NA        | 69         | 23          | 16           | 7      | 6        | 3              |
| SA        | 26         | 9           | 7            | 2      | 3        | 1              |
| Europe    | 63         | 23          | 13           | 4      | 4        | 3              |
| FSU       | 35         | 11          | 7            | 4      | 2        | 1              |
| Africa    | 11         | 2           | 1            | 1      | 0        | 2              |
| India     | 113        | 25          | 19           | 19     | 6        | 18             |
| East Asia | 113        | 21          | 15           | 13     | 16       | 12             |
| SE Asia   | 50         | 12          | 8            | 9      | 4        | 4              |
| Australia | 35         | 8           | 4            | 6      | 6        | 1              |
| ME        | 31         | 11          | 7            | 4      | 2        | 2              |
| Global    | 71         | 17          | 12           | 9      | 7        | 8              |

Table S10 – Premature PM<sub>2.5</sub>-related mortality in ten world regions (IHD+Stroke+COPD+LC), and contributions from different sectors (deaths in 2005), showing the mean and 95% CI from 1000 Monte Carlo simulations. All numbers are rounded to three significant digits. Regional mean values correspond to the values shown in Figure 5 of the main paper.

| Region          | All Anthropogenic                    | All Transportation             | Land Transportation            | Energy                         | Industry                       | Residential & Commercial       |
|-----------------|--------------------------------------|--------------------------------|--------------------------------|--------------------------------|--------------------------------|--------------------------------|
| North America   | 91,100<br>(6,200 - 223,000)          | 33,600<br>(5,180 – 60,600)     | 29,200<br>(4,540 - 51,700)     | 20,700<br>(1,290 - 40,600)     | 13,200<br>(1,490 - 23,500)     | 11,800<br>(1,820 - 20,400)     |
| South America   | 31,000<br>(1,220 - 75,100)           | 8,190<br>(1,020 – 13,900)      | 7,600<br>(1,010 - 12,800)      | 1,990<br>(187 - 3,760)         | 13,100<br>(1,090 - 23,100)     | 5,800<br>(965 - 10,100)        |
| Europe          | 236,000<br>(59,900 - 382,000)        | 76,700<br>(27,500 – 112,000)   | 56,200<br>(22,600 - 80,900)    | 38,300<br>(21,800 - 53,500)    | 25,600<br>(13,000 - 36,100)    | 64,000<br>(39,300 - 88,100)    |
| F. Soviet Union | 210,000<br>(48,400 - 334,000)        | 30,000<br>(15,000 – 38,300)    | 26,400<br>(13,600 - 33,600)    | 37,100<br>(16,100 - 47,400)    | 21,100<br>(11,800 - 26,600)    | 113,000<br>(41,300 - 144,000)  |
| Africa          | 28,600<br>(3,530 - 57,700)           | 1,940<br>(560 – 3,170)         | 1,540<br>(505 - 2,480)         | 2,760<br>(752 - 4,690)         | 2,030<br>(466 - 3,470)         | 12,000<br>(2,250 - 23,300)     |
| India           | 392,000<br>(129,000 - 590,000)       | 21,800<br>(11,700 – 31,600)    | 19,900<br>(11,100 -28,800)     | 39,200<br>(18,900 - 57,100)    | 36,400<br>(18,900 - 52,500)    | 173,000<br>(88,000 - 253,000)  |
| East Asia       | 1,060,000<br>(696,000 - 1,440,000)   | 61,000<br>(44,300 – 78,800)    | 48,000<br>(34,700 - 62,500)    | 117,000<br>(84,500 - 156,000)  | 178,000<br>(127,000 - 239,000) | 223,000<br>(158,000 - 299,000) |
| Southeast Asia  | 120,000<br>(30,900 - 215,000)        | 14,800<br>(5,650 – 22,300)     | 12,400<br>(4,990 - 18,000)     | 20,300<br>(8,160 - 29,700)     | 24,600<br>(9,080 - 36,000)     | 59,900<br>(24,200 - 90,900)    |
| Australia       | 922<br>(0 - 3,820)                   | 309<br>(0 – 1,020)             | 201<br>(0 – 638)               | 292<br>(0 – 920)               | 333<br>(0 - 1,070)             | 223<br>(0 – 681)               |
| Middle East     | 59,700<br>(41,800 - 79,600)          | 13,000<br>(9,180 – 17,600)     | 10,700<br>(7,550 - 14,500)     | 11,600<br>(8,160 - 15,700)     | 8,310<br>(5,920 - 11,100)      | 12,700<br>(9,120 - 17,500)     |
| Global          | 2,230,000<br>(1,040,000 – 3,330,000) | 261,000<br>(136,000 – 364,000) | 212,000<br>(114,000 – 292,000) | 290,000<br>(192,000 – 386,000) | 323,000<br>(230,000 – 430,000) | 675,000<br>(428,000 – 899,000) |

Table S11 – Premature PM<sub>2.5</sub>-related mortality (IHD+Stroke+COPD+LC) in ten world regions, and contributions from different sectors (deaths in 2005), showing the deterministic mean estimates. All numbers are rounded to three significant digits.

|           | All Anthr. | All Transp. | Land Transp. | Energy  | Industry | Resid. & Comm. |
|-----------|------------|-------------|--------------|---------|----------|----------------|
| NA        | 76,300     | 47,300      | 41,800       | 27,900  | 18,500   | 16,600         |
| SA        | 24,800     | 7,980       | 7,500        | 1,930   | 12,500   | 5,390          |
| Europe    | 251,000    | 94,700      | 66,000       | 42,800  | 28,900   | 68,200         |
| FSU       | 222,000    | 32,500      | 28,400       | 40,000  | 22,200   | 124,000        |
| Africa    | 29,000     | 2,130       | 1,690        | 3,000   | 2,180    | 12,000         |
| India     | 458,000    | 24,800      | 22,600       | 44,800  | 41,100   | 197,000        |
| East Asia | 1,110,000  |             |              |         |          |                |
| Asia      |            | 63,200      | 49,700       | 123,000 | 186,000  | 233,000        |
| SE Asia   | 124,000    | 15,300      | 12,800       | 21,900  | 26,000   | 63,100         |
| Australia | 276        | 195         | 141          | 189     | 216      | 165            |
| ME        | 66,200     | 13,800      | 11,400       | 12,100  | 8,930    | 14,700         |
| Global    | 2,360,000  | 302,000     | 242,000      | 317,000 | 347,000  | 734,000        |

Table S12 – Premature PM<sub>2.5</sub> -related mortality (IHD+Stroke+COPD+LC) per million people in total population in ten world regions, and contributions from different sectors (deaths per million people in 2005), showing the mean from 1000 Monte Carlo simulations. All numbers are rounded to the nearest unit.

|           | All Anthr. | All Transp. | Land Transp. | Energy | Industry | Resid. & Comm. |
|-----------|------------|-------------|--------------|--------|----------|----------------|
| NA        | 169        | 62          | 54           | 38     | 25       | 22             |
| SA        | 77         | 20          | 19           | 5      | 33       | 14             |
| Europe    | 457        | 149         | 109          | 74     | 50       | 124            |
| FSU       | 714        | 102         | 90           | 126    | 72       | 384            |
| Africa    | 32         | 2           | 2            | 3      | 2        | 14             |
| India     | 268        | 15          | 14           | 27     | 25       | 118            |
| East Asia | 683        | 39          | 31           | 76     | 115      | 144            |
| SE Asia   | 186        | 23          | 19           | 31     | 38       | 93             |
| Australia | 33         | 11          | 7            | 10     | 12       | 8              |
| ME        | 96         | 21          | 17           | 19     | 13       | 20             |
| Global    | 321        | 38          | 31           | 42     | 47       | 97             |

Table S13 – Premature ozone and PM<sub>2.5</sub>-related mortality in ten world regions for the contribution of all anthropogenic emissions at 2.5°x1.9° horizontal resolution (deaths in 2005), showing the deterministic mean estimates. All numbers are rounded to three significant digits.

|           | Ozone respiratory mortality | PM <sub>2.5</sub> mortality (IHD+Stroke+COPD+LC) |
|-----------|-----------------------------|--------------------------------------------------|
| NA        | 36,500                      | 116,000                                          |
| SA        | 9,470                       | 21,000                                           |
| Europe    | 32,400                      | 337,000                                          |
| FSU       | 9,930                       | 308,000                                          |
| Africa    | 9,060                       | 33,600                                           |
| India     | 163,000                     | 478,000                                          |
| East Asia | 171,000                     | 1,230,000                                        |
| SE Asia   | 29,700                      | 134,000                                          |
| Australia | 862                         | 468                                              |
| ME        | 18,600                      | 80,600                                           |
| Global    | 480,000                     | 2,740,000                                        |

Table S14 – Premature ozone and PM<sub>2.5</sub>-related mortality in ten world regions for the contribution of all anthropogenic emissions for the simulations at 0.67°x0.5° regrided to 2.5°x1.9° horizontal resolution (deaths in 2005), showing the deterministic mean estimates. All numbers are rounded to three significant digits.

|           | Ozone respiratory mortality | PM <sub>2.5</sub> mortality (IHD+Stroke+COPD+LC) |
|-----------|-----------------------------|--------------------------------------------------|
| NA        | 35,700                      | 57,900                                           |
| SA        | 9,700,                      | 10,200                                           |
| Europe    | 32,500                      | 241,000                                          |
| FSU       | 10,000                      | 197,000                                          |
| Africa    | 9,470                       | 25,500                                           |
| India     | 159,000                     | 435,700                                          |
| East Asia | 173,000                     | 1,049,000                                        |
| SE Asia   | 30,200                      | 98,100                                           |
| Australia | 820                         | 221                                              |
| ME        | 18,600                      | 59,300                                           |
| Global    | 479,000                     | 2,174,000                                        |



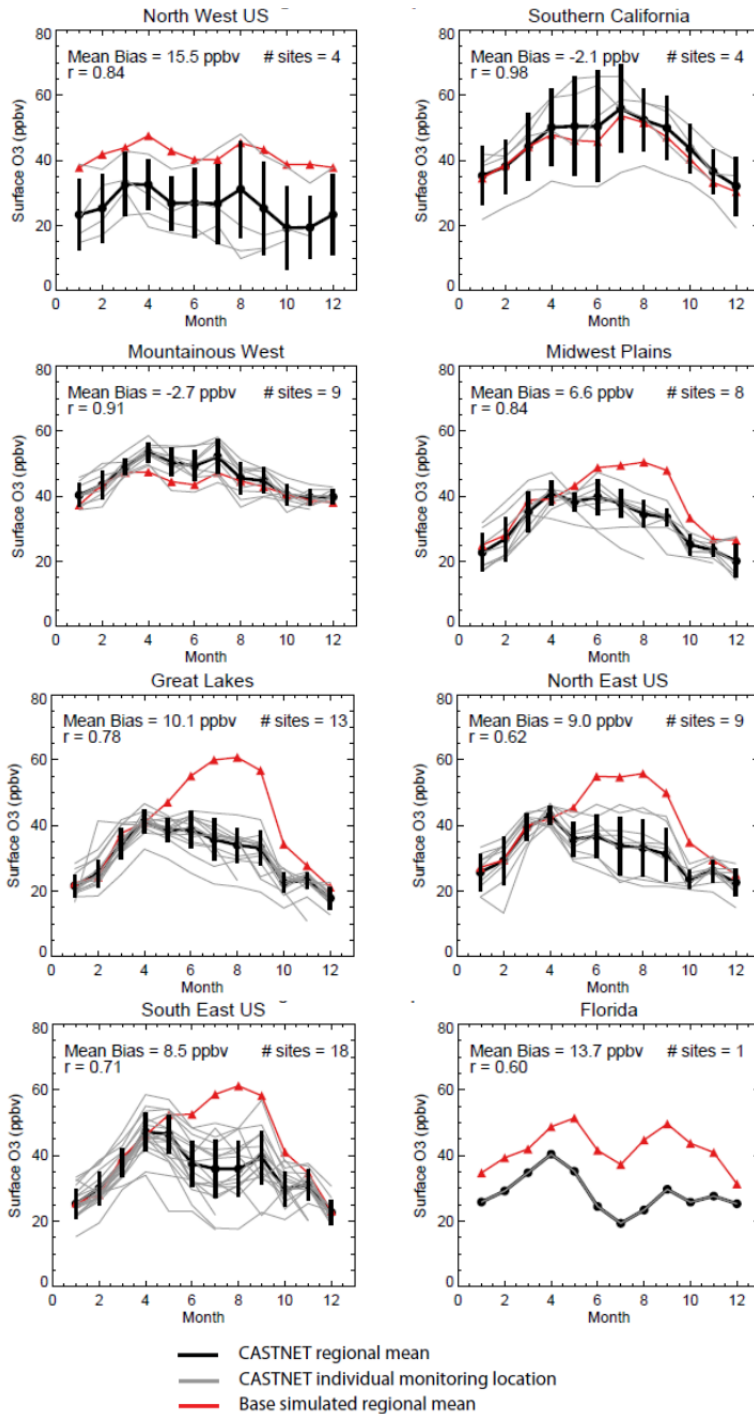

Figure S1 – Comparison of simulated monthly mean surface ozone concentrations (2005) with CASTNet monitored concentrations (2005) for eight US regions, showing modeled regional mean (red), CASTNET regional mean (black) and individual monitoring locations (grey). An overall model bias of 7.2 ppbv is calculated across all stations.

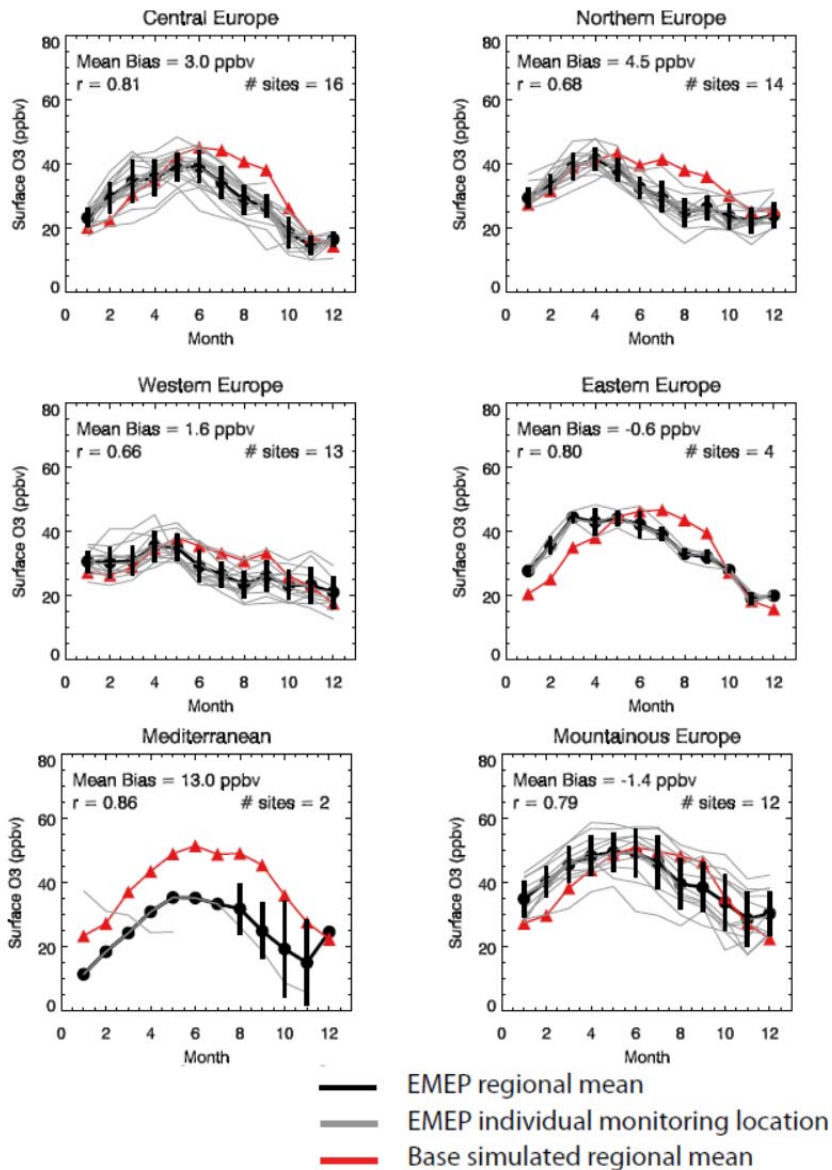

Figure S2 – Comparison of simulated monthly mean surface ozone concentrations (2005) with EMEP monitored concentrations (2005) for six European regions, showing modeled regional mean (red), EMEP regional mean (black) and individual monitoring locations (grey). An overall model bias of 2.3 ppbv is calculated across all stations.

(A) IMPROVE

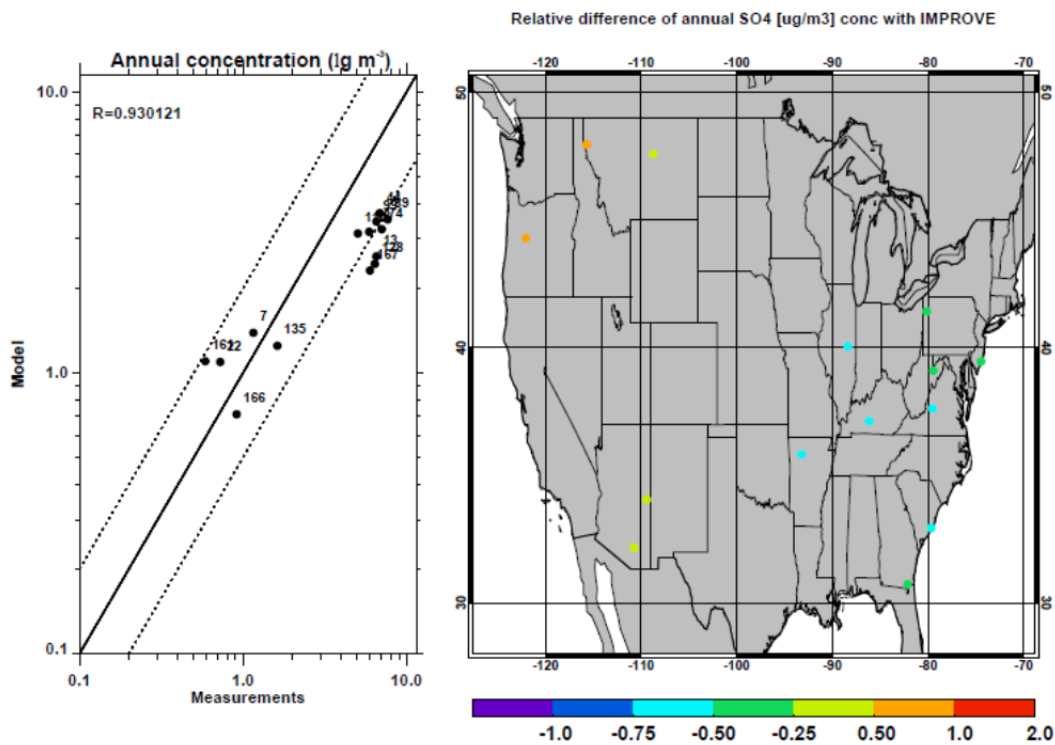

(B) EMEP

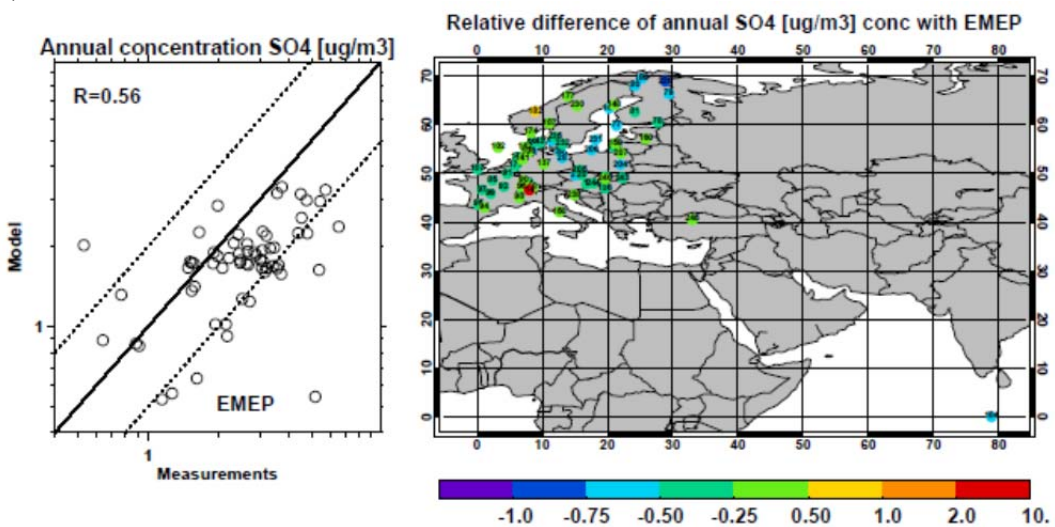

Figure S3 – Comparison of the simulated annual average (2005) surface  $\text{SO}_4$  concentrations ( $\mu\text{g m}^{-3}$ ) with annual average (2005) observations from the IMPROVE(A) and the EMEP (B) surface monitoring networks for the US and Europe, respectively. The left panels show modeled versus observed concentrations ( $\mu\text{g m}^{-3}$ ) with the dashed 1:2 and 2:1 lines representing

agreement within a factor of 2. The right panels show a map of  $[(\text{modeled}-\text{observed})/\text{observed}]$  values.

**(A) IMPROVE**

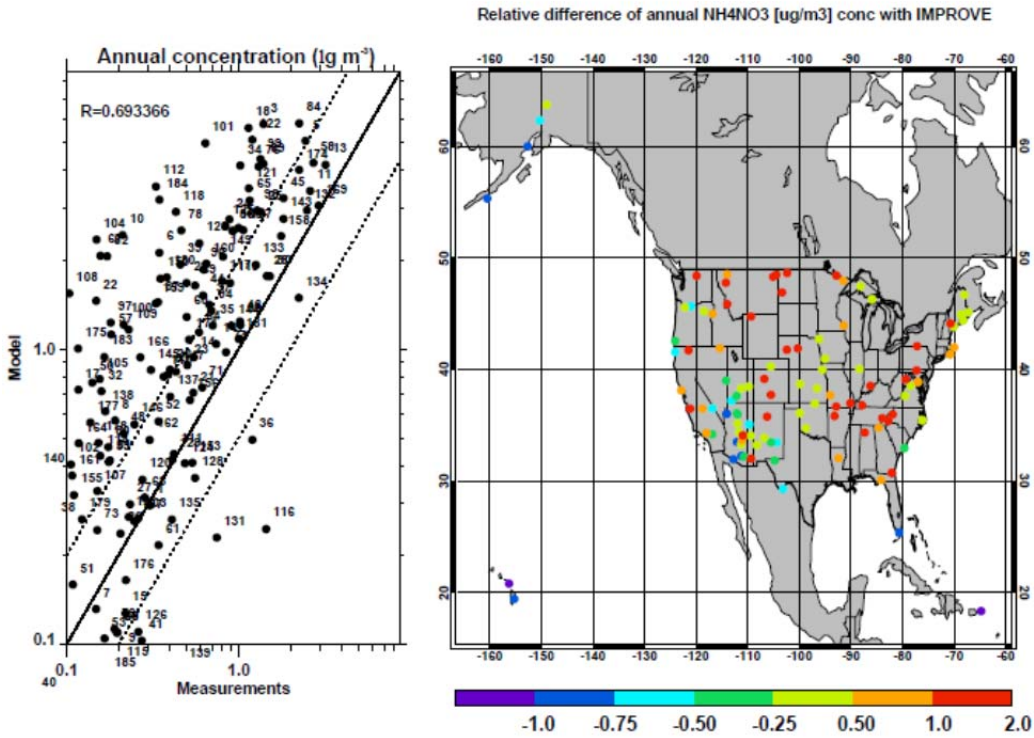

**(B) EMEP**

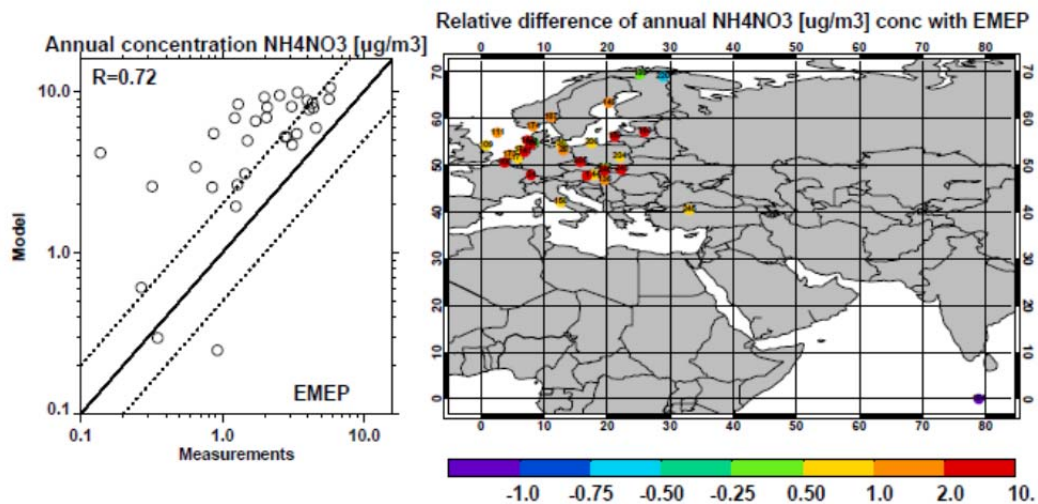

Figure S4 – Comparison of the simulated annual average (2005) surface  $\text{NH}_4\text{NO}_3$  concentrations ( $\mu\text{g m}^{-3}$ ) with annual average (2005) observations from the IMPROVE (A) and the EMEP (B)

surface monitoring networks for the US and Europe, respectively. The left panels show modeled versus observed concentrations ( $\mu\text{g m}^{-3}$ ) with the dashed 1:2 and 2:1 lines representing agreement within a factor of 2. The right panels show a map of [(modeled-observed)/observed] values.

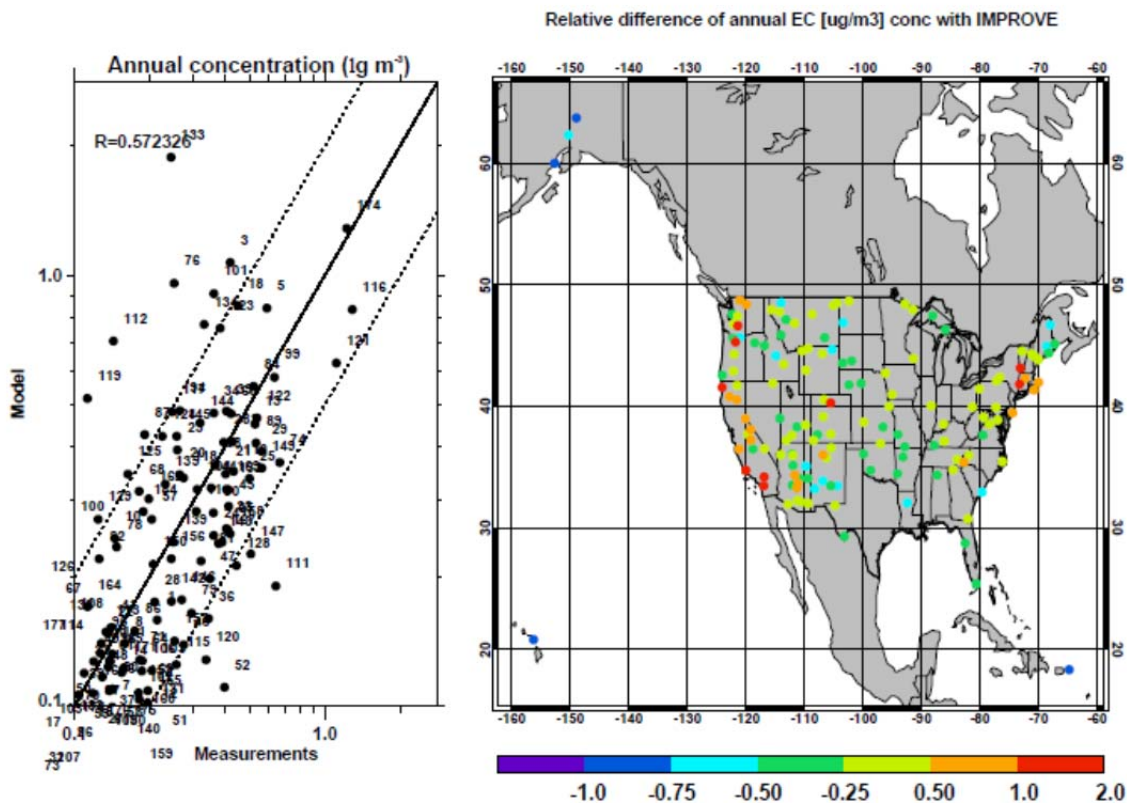

Figure S5 – Comparison of the simulated annual average (2005) surface EC concentrations ( $\mu\text{g m}^{-3}$ ) with annual average (2005) observations from the IMPROVE surface monitoring networks, US. The left panels show modeled versus observed concentrations ( $\mu\text{g m}^{-3}$ ) with the dashed 1:2 and 2:1 lines representing agreement within a factor of 2. The right panels show a map of [(modeled-observed)/observed] values.



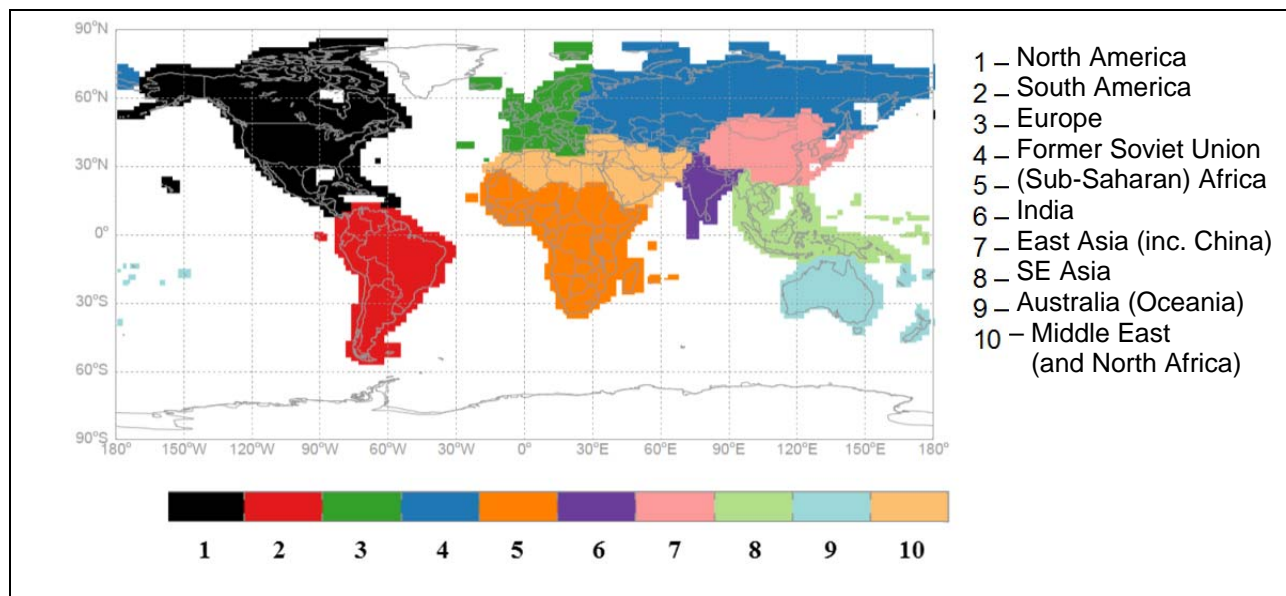

Figure S7 – Ten World Regions.

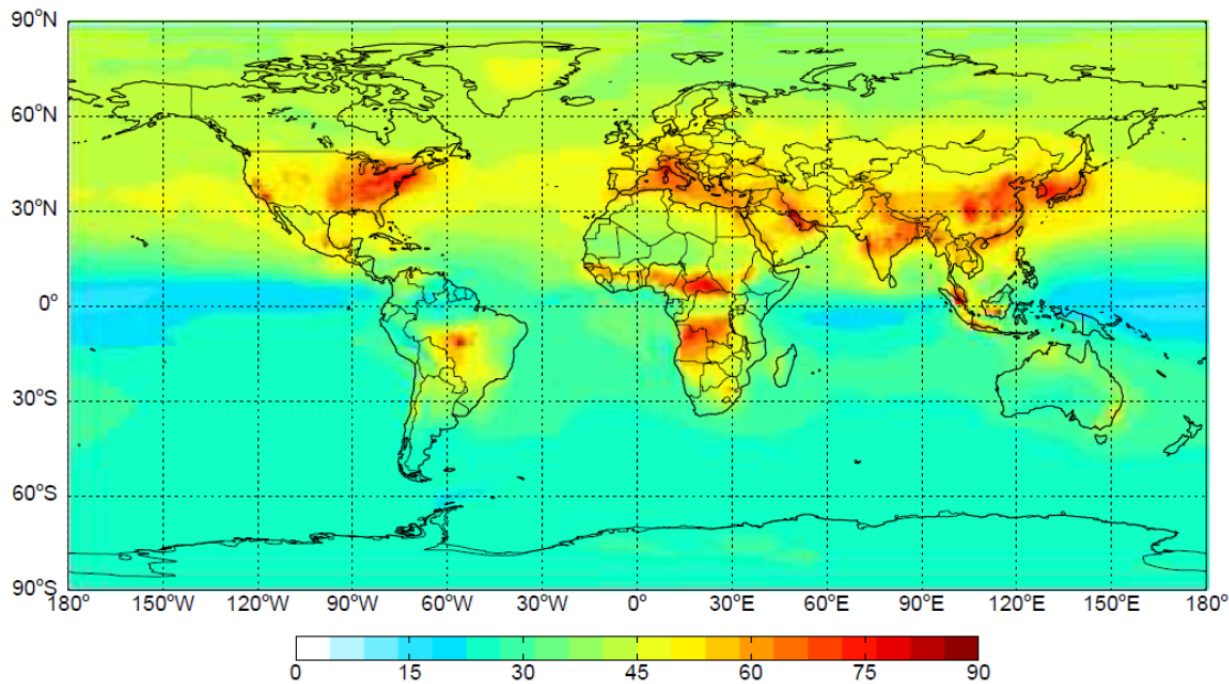

Figure S8 – Ozone concentrations in the baseline simulation (ppb), showing the average 1-hr daily maximum ozone for the consecutive 6-month period with the highest average in each cell.

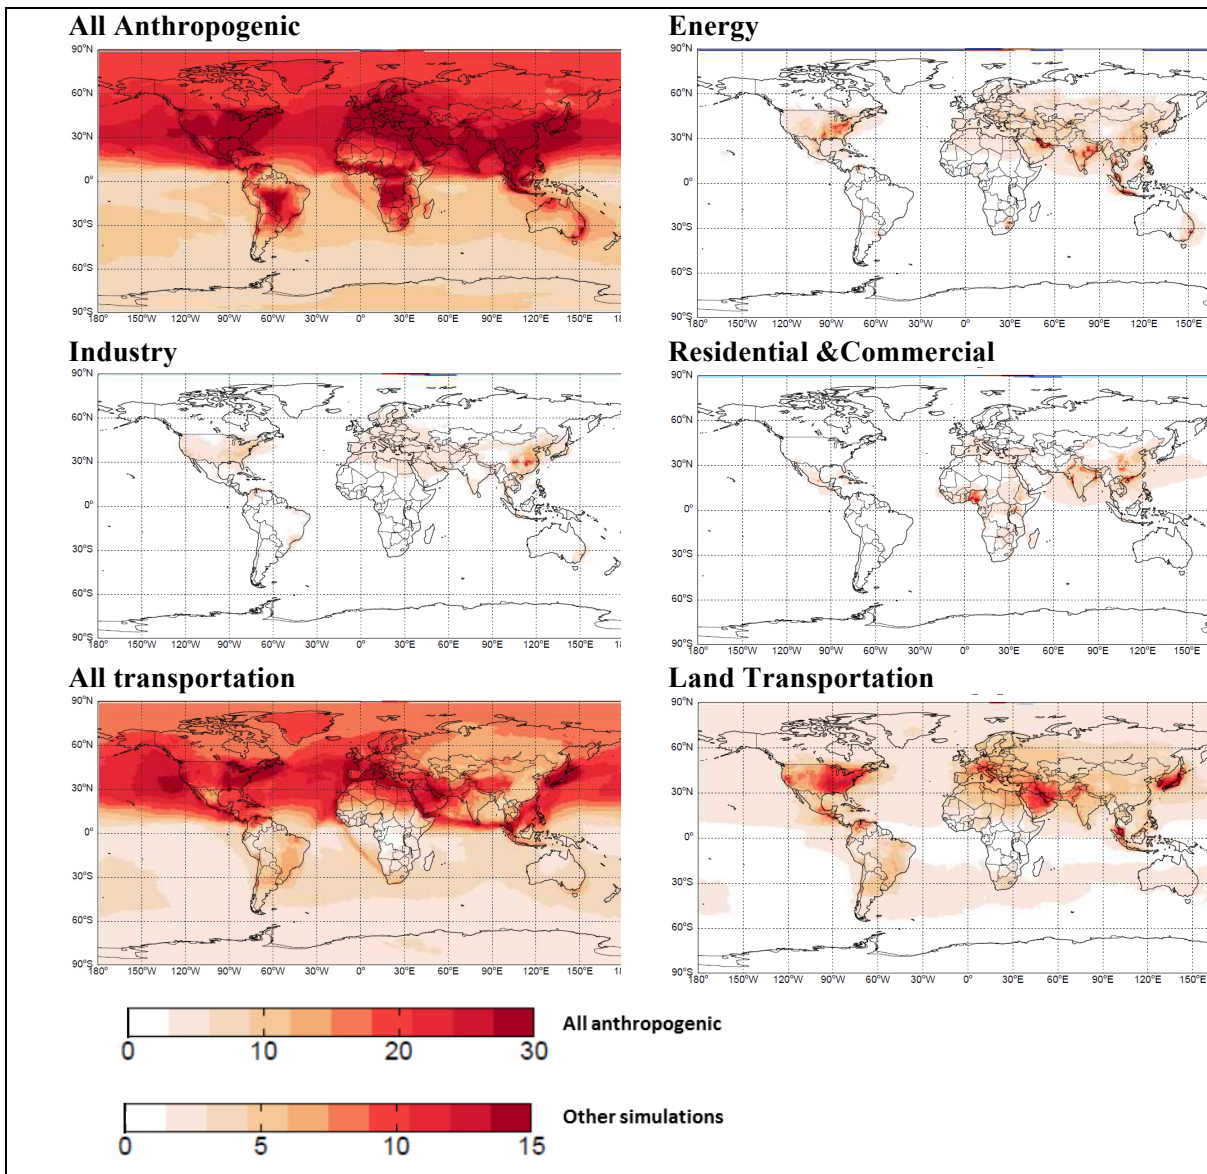

Figure S9 – Difference in ozone concentrations between the baseline and zeroed-out simulations (ppb), using the average 1-hr daily maximum ozone for the consecutive 6-month period with the highest average in each cell.



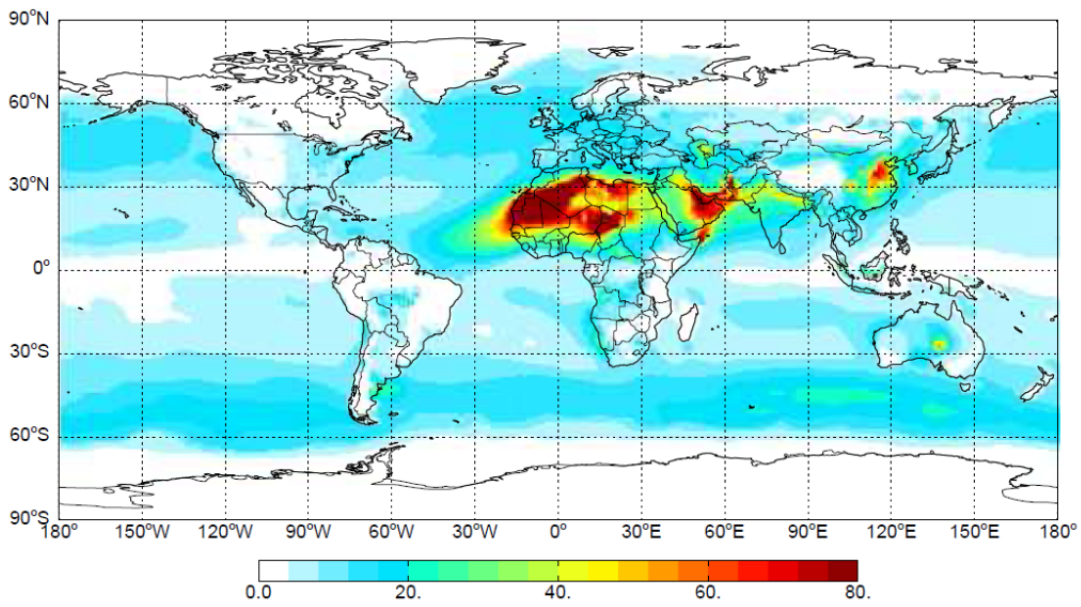

Figure S10 – PM<sub>2.5</sub> concentrations in the baseline simulation ( $\mu\text{g}/\text{m}^3$ ), showing the annual average concentrations in each cell.

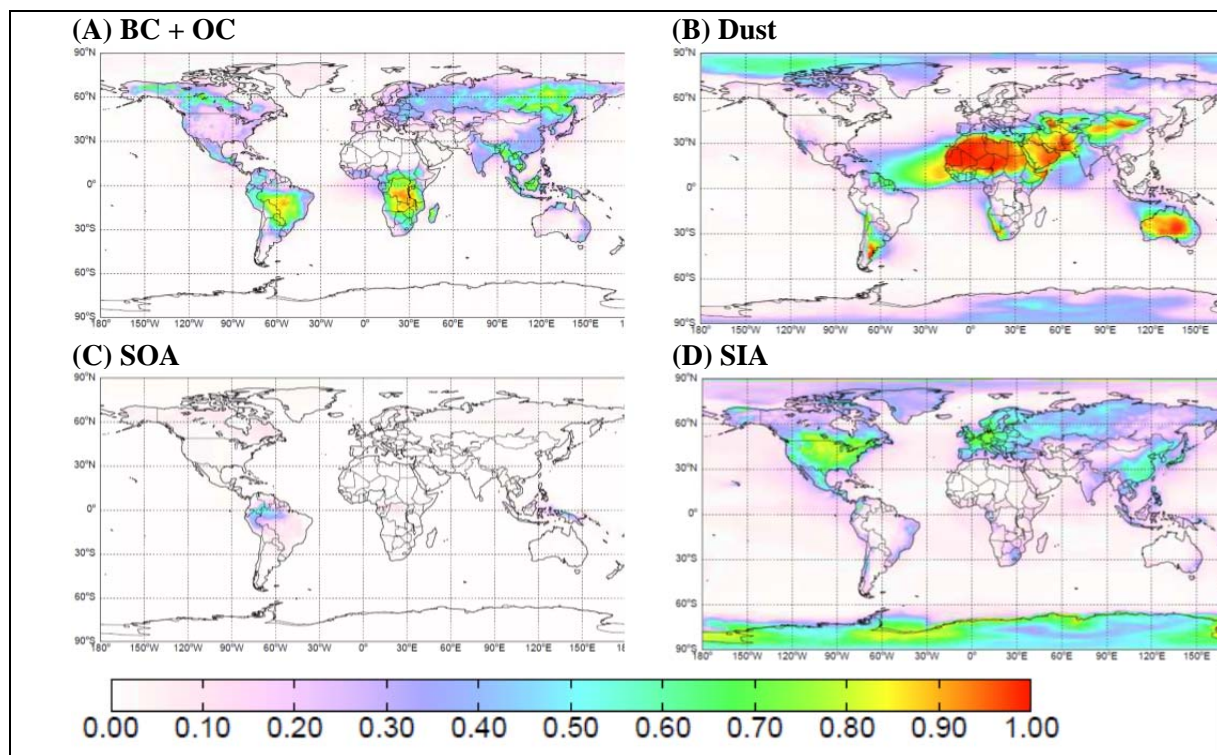

Figure S11 – Fraction of selected PM<sub>2.5</sub> species (A – D) in total PM<sub>2.5</sub> concentrations in the baseline simulation.

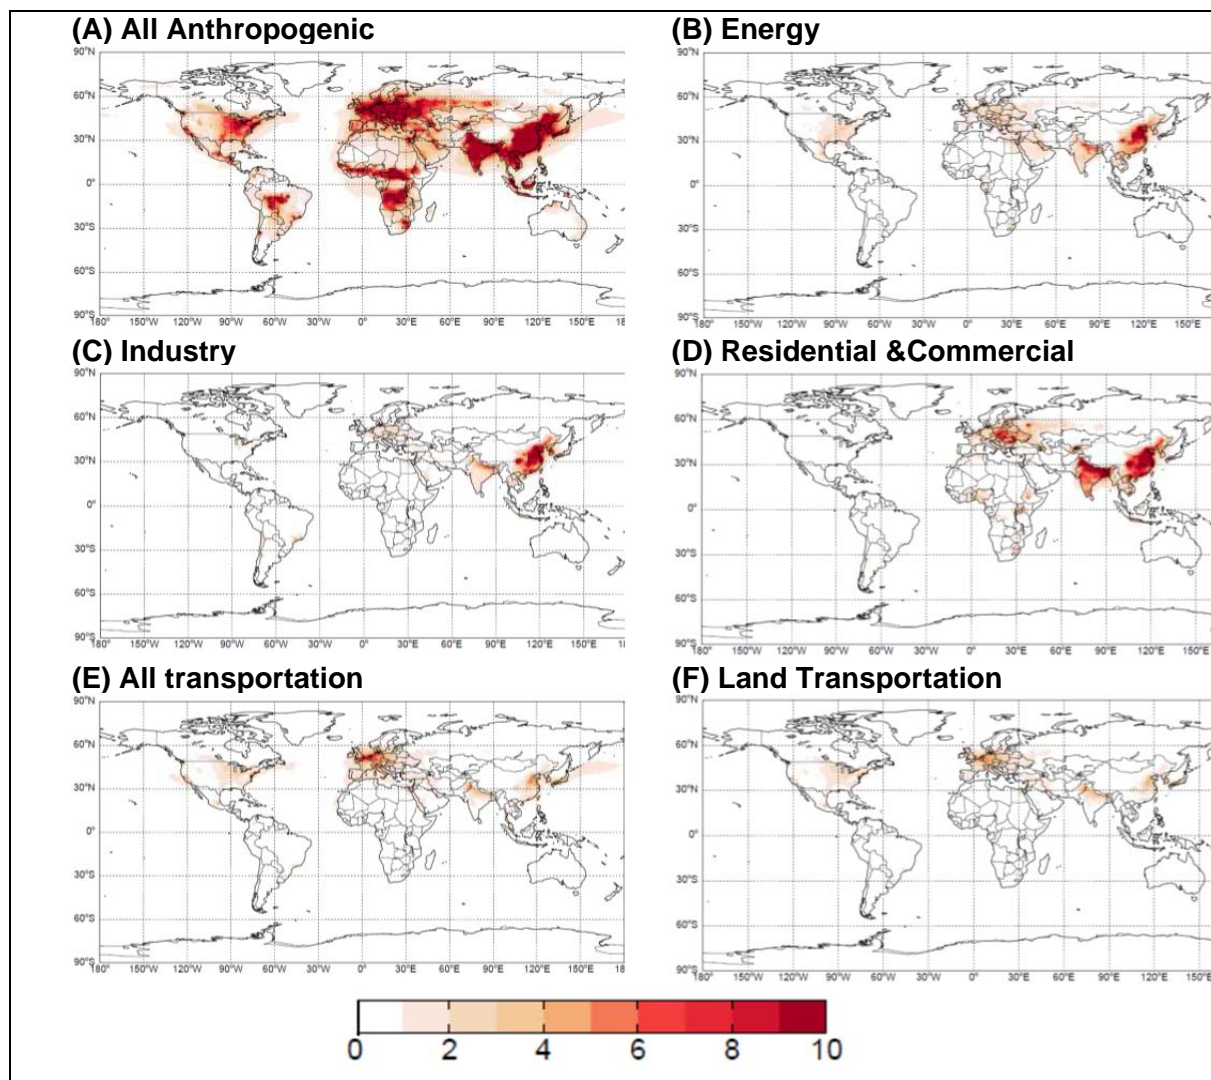

Figure S12 – Difference in PM<sub>2.5</sub> concentrations between the baseline and zeroed-out simulations (A – F) ( $\mu\text{g}/\text{m}^3$ ), using the annual average concentrations in each cell.
